# Supplementary material
Source: Springer Nature journal article supplement (https://www.springermedizin.de/resource/supplementary/13058_2010_9479_MOESM5_ESM.pdf/9702240)
Supplement: MOESM5 [file 9702240]

## A) Immunohistochemistry

Pokemon

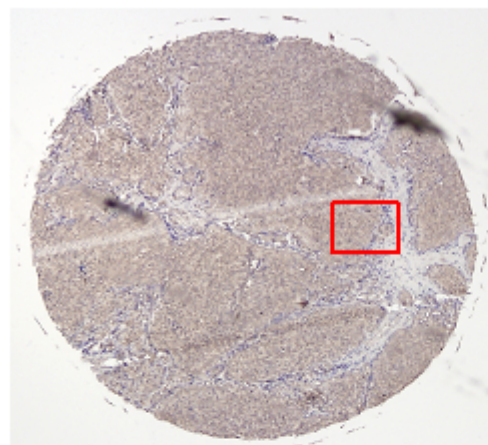

Survivin

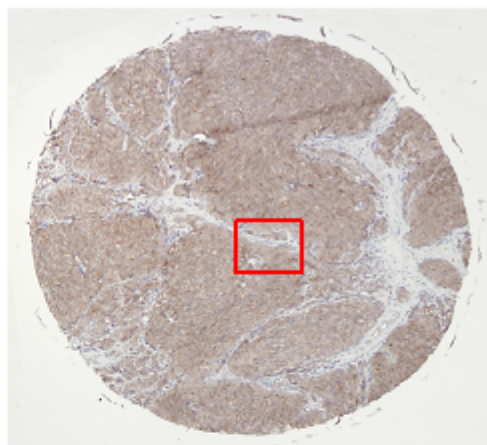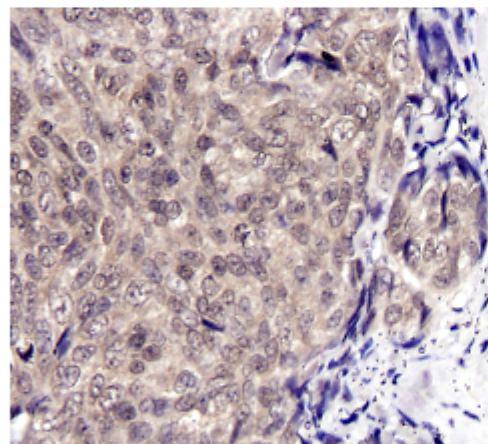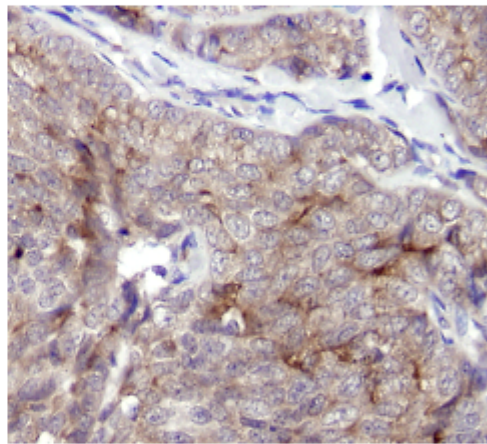

## B) Correlation of Pokemon and survivin expression

|          | Case number | Staining score (%) |           |           |           | p value | Spearman r |
|----------|-------------|--------------------|-----------|-----------|-----------|---------|------------|
|          |             | 0                  | 1         | 2         | 3         |         |            |
| Pokemon  | 49          | 9 (18.4)           | 6 (12.2)  | 16 (32.7) | 18 (36.7) | <0.0001 | 0.6799     |
| Survivin | 49          | 6 (12.2)           | 12 (24.5) | 14 (28.6) | 17 (34.7) |         |            |
